# Supplementary material
Source: ML conference proceedings conference paper supplement (https://openaccess.thecvf.com/content/CVPR_2019/html/Chen_Progressive_Feature_Alignment_CVPR_2019_paper.html)
Supplement: Supplementary file 1 [file Chen_Progressive_Feature_Alignment_CVPR_2019_supplemental.pdf]

# Progressive Feature Alignment for Unsupervised Domain Adaptation Supplementary Material

Chaoqi Chen<sup>\*1</sup>, Weiping Xie<sup>\*1</sup>, Wenbing Huang<sup>2</sup>, Yu Rong<sup>2</sup>, Xinghao Ding<sup>1</sup>,  
Yue Huang<sup>†1</sup>, Tingyang Xu<sup>†2</sup>, Junzhou Huang<sup>2</sup>

<sup>1</sup> Fujian Key Laboratory of Sensing and Computing for Smart City,

School of Information Science and Engineering, Xiamen University, China

<sup>2</sup> Tencent AI Lab

cqchen94@stu.xmu.edu.cn, xiewp@stu.xmu.edu.cn, hwenbing@126.com, yu.rong@hotmail.com

dxh@xmu.edu.cn, huangyue05@gmail.com, Tingyangxu@tencent.com, jzhuang@uta.edu

## 1. Proof of Theorem

We resort to the pseudo-labels to bound the combined error of the ideal hypothesis,  $C$ . Then, the following inequality holds:

**Theorem 1.** *Let  $f_{\hat{\mathcal{T}}}$  be the pseudo-labeling function. Given  $R_{\mathcal{T}'}(f_S, f_{\hat{\mathcal{T}}})$  and  $R_{\mathcal{T}'}(f_{\mathcal{T}}, f_{\hat{\mathcal{T}}})$  as the minimum shared error and the degree to which the target samples are falsely labeled on  $\hat{D}_t$ , respectively. We have*

$$C \leq \min_{h \in \mathcal{H}} R_S(h, f_S) + R_{\mathcal{T}'}(h, f_{\hat{\mathcal{T}}}) + 2R_{\mathcal{T}'}(f_S, f_{\hat{\mathcal{T}}}) + R_{\mathcal{T}'}(f_{\mathcal{T}}, f_{\hat{\mathcal{T}}}). \quad (1)$$

*Proof.* This proof relies on the triangle inequality for classification error [1, 2], which implies that for any labeling functions  $f_1, f_2$ , and  $f_3$ , we have  $R(f_1, f_2) \leq R(f_1, f_3) + R(f_2, f_3)$ . Then

$$\begin{aligned} C &= \min_{\forall h \in \mathcal{H}} R_S(h, f_S) + R_{\mathcal{T}'}(h, f_{\hat{\mathcal{T}}}) \\ &\leq \min_{\forall h \in \mathcal{H}} R_S(h, f_S) + R_{\mathcal{T}'}(h, f_S) + R_{\mathcal{T}'}(f_S, f_{\hat{\mathcal{T}}}) \\ &\leq \min_{\forall h \in \mathcal{H}} R_S(h, f_S) + R_{\mathcal{T}'}(h, f_{\hat{\mathcal{T}}}) + R_{\mathcal{T}'}(f_S, f_{\hat{\mathcal{T}}}) \\ &\quad + R_{\mathcal{T}'}(f_S, f_{\hat{\mathcal{T}}}) + R_{\mathcal{T}'}(f_{\mathcal{T}}, f_{\hat{\mathcal{T}}}) \\ &= \min_{\forall h \in \mathcal{H}} R_S(h, f_S) + R_{\mathcal{T}'}(h, f_{\hat{\mathcal{T}}}) \\ &\quad + 2R_{\mathcal{T}'}(f_S, f_{\hat{\mathcal{T}}}) + R_{\mathcal{T}'}(f_{\mathcal{T}}, f_{\hat{\mathcal{T}}}) \end{aligned}$$

Therefore, the main inequality (1) holds.  $\square$

## 2. Experiments

**More Training Details.** For Office-31 and ImageCLEF-DA datasets (AlexNet-based): (1) we augment the input images by scaling all images to  $256 \times 256$ , randomly cropping

\* indicates equal contributions.

† Corresponding authors

Table 5: Comparing Different Temperature  $T$  on  $A \rightarrow W$ .

| $T$          | 1.5  | 1.6  | 1.7  | 1.8         | 1.9  | 2.0  |
|--------------|------|------|------|-------------|------|------|
| Accuracy (%) | 80.9 | 81.8 | 82.1 | <b>83.0</b> | 80.9 | 80.7 |

$227 \times 227$  patches and executing random flips; (2) we set the batch size to 100 for each domain; (3) We add a bottleneck layer fcb with 256 units after the fc7 layer for safer transfer representation learning; (4) the discriminator consists of 3 fully connected layers:  $1024 \rightarrow 1024 \rightarrow 1$ . For digit recognition datasets: (1) all images are cast to  $32 \times 32 \times 1$  in all experiments for fair comparison; (2) we set the batch size to 128 for each domain; (3) the discriminator consists of 3 fully connected layers:  $500 \rightarrow 500 \rightarrow 1$ ; (4) We use the Adam optimizer with learning rates set to 0.01 instead of the learning rate annealing strategy.

**Comparing Different Temperature  $T$ .** We perform sensitivity analysis of the temperature  $T$  on transfer task  $A \rightarrow W$ . We provide the classification accuracy as the changing of  $T$  in [1.5, 0.1, 2.0] and the results are reported in Table 5. The accuracy first increases and then decreases as  $T$  varies and shows a best result when  $T = 1.8$ . The results implicitly confirm our assumption that a good UDA model needs a non-saturated source classifier.

## References

- [1] Shai Ben-David, John Blitzer, Koby Crammer, and Fernando Pereira. Analysis of representations for domain adaptation. In *Advances in neural information processing systems*, pages 137–144, 2007.
- [2] Koby Crammer, Michael Kearns, and Jennifer Wortman. Learning from multiple sources. *Journal of Machine Learning Research*, 9(Aug):1757–1774, 2008.
